# Supplementary material for: Gene Amplification of CYP51B: a New Mechanism of Resistance to Azole Compounds in Trichophyton indotineae
Source: PubMed Central journal article supplement (PMC9211412; doi:10.1128/aac.00059-22), 2022-05-12
Supplement: aac.00059-22-s0001.pdf [file aac.00059-22-s0001.pdf]

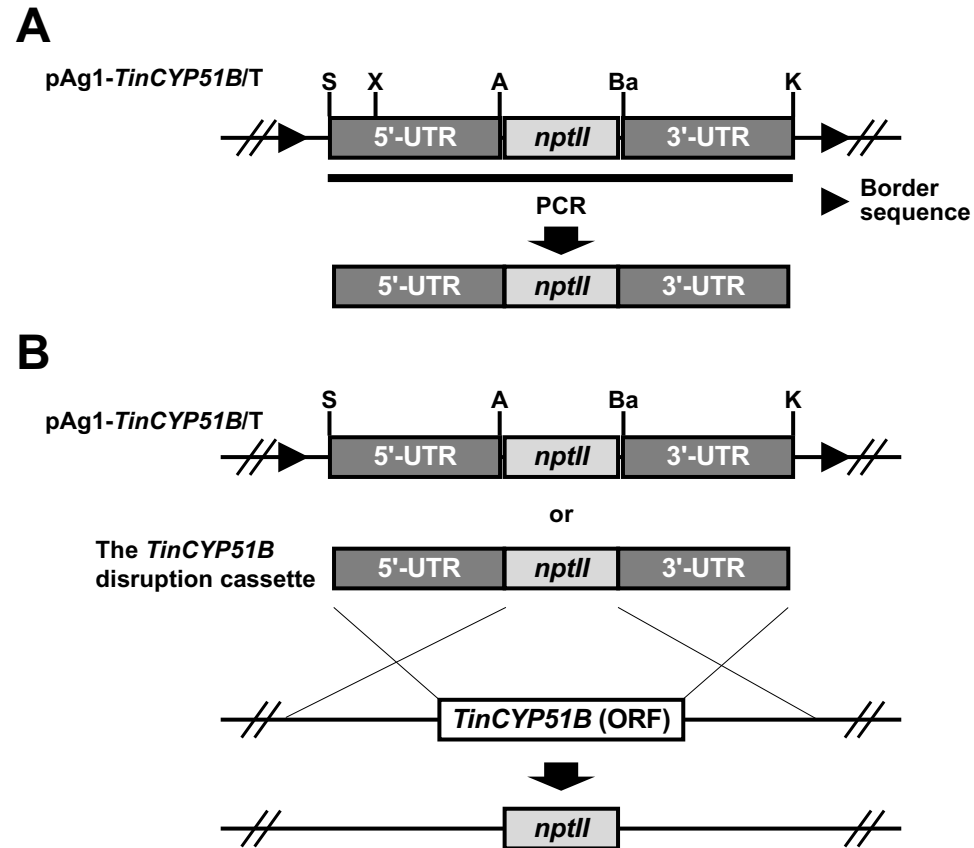

**FIG. S1** Disruption of the *TinCYP51B* gene of *T. indotinea* strains with low azole susceptibility by gene replacement strategy. (A) Schematic representation of a part of the *TinCYP51B*-targeting vector pAg1-*TinCYP51B/T*. Plasmid DNA of pAg1-*TinCYP51B/T* was used as a template for PCR, to amplify the sequence indicated by the thick line. The *nptII* cassette is composed of *PtpC*, *nptII*, and *TcgrA*. Border sequences are the specific regions that delineate the DNA to be transferred during *Agrobacterium tumefaciens*-mediated transformation. Restriction enzyme site: A, *ApaI*; Ba, *BamHI*; E, *EcoRI*; K, *KpnI*; P, *PstI*; S, *SpeI*. (B) Schematic representation of the *TinCYP51B* locus before and after homologous recombination.

**TABLE S1** Primers used in this study

| Primer name | Sequence (5'-3')                    | Chain      | Purpose                                                       |
|-------------|-------------------------------------|------------|---------------------------------------------------------------|
| P1          | ATGGCCGTGTTACAGTGG                  | Sense      | Amplification of <i>TinCYP51A</i>                             |
| P2          | TCAATGTGACTGAGGACGTCG               | Anti-sense | Amplification of <i>TinCYP51A</i>                             |
| P3          | ATGGGCCTCTTAGCCGAC                  | Sense      | Amplification of <i>TinCYP51B</i>                             |
| P4          | TCATTTCTGGGAAGGCTGC                 | Anti-sense | Amplification of <i>TinCYP51B</i>                             |
| P5          | TGTTGGTGATGAGGCACAGT                | Sense      | qRT-PCR ( <i>TinACTIN</i> )                                   |
| P6          | CCATGTCATCCCAGTTTGTG                | Anti-sense | qRT-PCR ( <i>TinACTIN</i> )                                   |
| P7          | GCGTGACCCAGCCAACA                   | Sense      | qRT-PCR ( <i>TinGAPDH</i> )                                   |
| P8          | TTGGCACCTCCCTTCAAGT                 | Anti-sense | qRT-PCR ( <i>TinGAPDH</i> )                                   |
| P9          | CCTAATGCCCTTCCTGGATT                | Sense      | qRT-PCR ( <i>TinMDR1</i> )                                    |
| P10         | AAATTGCCAGCTCGTTCTGT                | Anti-sense | qRT-PCR ( <i>TinMDR1</i> )                                    |
| P11         | TGACTCTGAATCCGAAAAGG                | Sense      | qRT-PCR ( <i>TinMDR2</i> )                                    |
| P12         | GTCGGTGAGCAACAGCAATA                | Anti-sense | qRT-PCR ( <i>TinMDR2</i> )                                    |
| P13         | TCACTGGTGAAATGCTCGTTGACG            | Sense      | qRT-PCR ( <i>TinMDR3</i> )                                    |
| P14         | GGTTGACGGAGCAAGGCACTG               | Anti-sense | qRT-PCR ( <i>TinMDR3</i> )                                    |
| P15         | GAGACGTAGATATTTGAGTGCC              | Sense      | qRT-PCR ( <i>TinCYP51A</i> )                                  |
| P16         | TTGAGCGTACCTCTTCCCCCTG              | Anti-sense | qRT-PCR ( <i>TinCYP51A</i> )                                  |
| P17         | AAGTTCGTCAAGTTCGGCCT                | Sense      | qRT-PCR ( <i>TinCYP51B</i> )                                  |
| P18         | GAGAGGCGGTGTAGATGGTG                | Anti-sense | qRT-PCR ( <i>TinCYP51B</i> )                                  |
| P19         | GCTGATGCCAATGCCATGGAG               | Sense      | qRT-PCR ( <i>TinMFS2</i> )                                    |
| P20         | TCGGGTTTCGAGGATCGCTTGG              | Anti-sense | qRT-PCR ( <i>TinMFS2</i> )                                    |
| P21         | AAAGGATCCCCACTAAGACTCCTTCAAGCTCCCCA | Sense      | Amplification of <i>Ptefla</i> for pAg1- <i>TinCYP51B</i> /OE |
| P22         | GGCTAAGAGGCCCATGGTGACGGTGTATTTTTGTG | Anti-sense | Amplification of <i>Ptefla</i> for pAg1- <i>TinCyp51B</i> /OE |
| P23         | GCAGCCTTCCCAGAAATGACAGCAGAAGAATCTCT | Sense      | Amplification of <i>TcgrA</i> for pAg1- <i>TinCYP51B</i> /OE  |
| P24         | AAAAGGTACCAGATGATTCATGA             | Anti-sense | Amplification of <i>TcgrA</i> for pAg1- <i>TinCYP51B</i> /OE  |
| P25         | AAATACACCGTCACCATGGGCCTCTTAGCCGACAT | Sense      | <i>TinCYP51B</i> cDNA                                         |

|     |                                              |            |                                                                                                                                                          |
|-----|----------------------------------------------|------------|----------------------------------------------------------------------------------------------------------------------------------------------------------|
| P26 | AGAGATTCTTCTGCTGTCATTTCTGGGAAGGCTGC          | Anti-sense | <i>TinCYP51B</i> cDNA                                                                                                                                    |
| P27 | TTT <u>CTCGAG</u> CCTCACCGATGGGAGAACAACGTCGG | Sense      | Amplification of the <i>TinCYP51B</i> cDNA fragment for pSilent1- <i>TinCYP51B</i> ; Amplification of the <i>TinCYP51B</i> -specific hybridization probe |
| P28 | TTT <u>AAGCTT</u> TGGCGGCACAACATCTTTGGTGCCTT | Anti-sense | Amplification of the <i>TinCYP51B</i> cDNA fragment for pSilent1- <i>TinCYP51B</i> ; Amplification of the <i>TinCYP51B</i> -specific hybridization probe |
| P29 | TTT <u>AGATCT</u> TGGCGGCACAACATCTTTGGTGCCTT | Sense      | Amplification of the anti-sense <i>TinCYP51B</i> cDNA fragment for pSilent1- <i>TinCYP51B</i>                                                            |
| P30 | TTT <u>GGTACC</u> CCTCACCGATGGGAGAACAACGTCGG | Anti-sense | Amplification of the anti-sense <i>TinCYP51B</i> cDNA fragment for pSilent1- <i>TinCYP51B</i>                                                            |
| P31 | TTT <u>ACTAGT</u> CCACTAAGACTCCTTCAAGCT      | Sense      | Amplification of <i>Ptef1α</i> for pSilent1- <i>TinCYP51B</i>                                                                                            |
| P32 | TTCTACAGATGGTAACTgGTCGAGAGCAGAGAGTA          | Anti-sense | Inactivation of the internal SpeI site by overlap extension PCR                                                                                          |
| P33 | TACTCTCTGCTCTCGACcAGTTACCATCTGTAGAA          | Sense      | Inactivation of the internal SpeI site by overlap extension PCR                                                                                          |
| P34 | TTT <u>CTCGAG</u> GGTGACGGTGTATTTTTGTGTGGTT  | Anti-sense | Amplification of <i>Ptef1α</i> for pSilent1- <i>TinCYP51B</i>                                                                                            |
| P35 | CATG <u>ACTAGT</u> GCGGTATGCCTTTACCCATTGCATA | Sense      | Amplification of the 5' UTR of <i>TinCYP51B</i> gene                                                                                                     |
| P36 | AA <u>AGGGCC</u> CATGGTGATCGTCTTATCCTCCTGCT  | Anti-sense | Amplification of the 5' UTR of <i>TinCYP51B</i> gene; Amplification of the <i>TmeCYP51B</i> -specific hybridization probe                                |
| P37 | CC <u>AGGGATC</u> CTAATCACGACTGCGGATTGAATCAT | Sense      | Amplification of the 3' UTR of <i>TinCYP51B</i> gene                                                                                                     |
| P38 | TTATCAGCCATGCGTACcGTACCTTCATCAATCTC          | Anti-sense | Inactivation of the internal KpnI site by overlap extension PCR                                                                                          |
| P39 | GAGATTGATGAAGGTACgGTACGCATGGCTGATAA          | Sense      | Inactivation of the internal KpnI site by overlap extension PCR                                                                                          |
| P40 | CCCTTACCGGTTTACCTtGGCCCTTGGTGCCGTGG          | Anti-sense | Inactivation of the internal ApaI site by overlap extension PCR                                                                                          |
| P41 | CCACGGCACCAAGGGCCaAGGTAAACCGGTAAGGG          | Sense      | Inactivation of the internal ApaI site by overlap extension PCR                                                                                          |
| P42 | CCC <u>AGGTACC</u> ATATGTCGACTGCACCGGAATATTG | Anti-sense | Amplification of the 3' UTR of <i>TinCYP51B</i> gene                                                                                                     |
| P43 | GTGT <u>ACTagt</u> ACCGTGGTCATCGTGTAGATGATAT | Sense      | Amplification of the 5' UTR of <i>TinMDR3</i> gene                                                                                                       |
| P44 | TATTGTGAGCCATAGGGaACCGATTTACTCTGAAA          | Anti-sense | Inactivation of the internal KpnI site by overlap extension PCR                                                                                          |
| P45 | TTTCAGAGTAAATCGGTtCCCTATGGCTCACATA           | Sense      | Inactivation of the internal KpnI site by overlap extension PCR                                                                                          |

|       |                                              |            |                                                                                                                                    |
|-------|----------------------------------------------|------------|------------------------------------------------------------------------------------------------------------------------------------|
| P46   | CAGCGTATGTTTCAGGGCCtAATCATATGCCACAGA         | Anti-sense | Inactivation of the internal ApaI site by overlap extension PCR                                                                    |
| P47   | TCTGTGGCATATGATTaGGCCCTGAACATACGCTG          | Sense      | Inactivation of the internal ApaI site by overlap extension PCR; Amplification of the <i>TinMDR3</i> -specific hybridization probe |
| P48   | TTT <u>GGGCC</u> CTGCTGATCTCTGTGGACGATAGCAC  | Anti-sense | Amplification of the 5' UTR of <i>TinMDR3</i> gene; Amplification of the <i>TinMDR3</i> -specific hybridization probe              |
| P49   | TTCC <u>GATCC</u> CATGAGCCATTACACATGGGTTACA  | Sense      | Amplification of the 3' UTR of <i>TinMDR3</i> gene                                                                                 |
| P50   | TACCATGGACATGGTACtGGTGCAACCAGGACGA           | Anti-sense | Inactivation of the internal KpnI site by overlap extension PCR                                                                    |
| P51   | TCGTCCTGGTTGCACCAaGTACCATGTCCATGGTA          | Sense      | Inactivation of the internal KpnI site by overlap extension PCR                                                                    |
| P52   | TGAG <u>GTA</u> CCTACTACTCTGTGAAATCAGTTAACTT | Anti-sense | Amplification of the 3' UTR of <i>TinMDR3</i> gene                                                                                 |
| P53   | GGC <u>ACTAGT</u> TATGGCTAACCGTTGTCGTAGCATGA | Sense      | Amplification of the <i>TmeCYP51B1</i> and <i>TmeCYP51B2</i> fragments                                                             |
| P54   | AAAG <u>GGCC</u> CTCATTCTGGGAAGGCTGCTTTCGCT  | Anti-sense | Amplification of the <i>TmeCYP51B1</i> and <i>TmeCYP51B2</i> fragments                                                             |
| P55   | AGACAGATTACGaATACGGCTTGGTT                   | Sense      | Generation of a point mutation in <i>TmeCYP51B</i>                                                                                 |
| P56   | AACCAAGCCGTATtCGTAATCTGTCT                   | Anti-sense | Generation of a point mutation in <i>TmeCYP51B</i>                                                                                 |
| P57   | TTGACGGACCGTTGATAGCTTAACCTGCCATGACT          | Sense      | Amplification of the <i>TmeCYP51B</i> -specific hybridization probe                                                                |
| P58   | TTT <u>CTCGAG</u> ATGGGCCTCTTAGCCGACATTGTCTC | Sense      | Amplification of the <i>TinCYP51B</i> -specific hybridization probe                                                                |
| P59   | TTT <u>AAGCTT</u> CTTGCAGTCGTCAAAGAACTTGTACG | Anti-sense | Amplification of the <i>TinCYP51B</i> -specific hybridization probe                                                                |
| P60   | TTC <u>AGATCT</u> AGAAGATGATATTGAAGG         | Sense      | Amplification of the <i>nptII/TinCYP51B</i> cDNA cassette                                                                          |
| P61   | CGATTAAGTTGGGTAACGCCAG                       | Anti-sense | Amplification of the <i>nptII/TinCYP51B</i> cDNA cassette                                                                          |
| P62   | ATGAAAAAGCCTGAACTCAC                         | Sense      | Amplification of the <i>hph</i> gene                                                                                               |
| P63   | GTTTCCACTATCGGCGAGTA                         | Anti-sense | Amplification of the <i>hph</i> gene                                                                                               |
| T7    | TAATACGACTCACTATAGGG                         | Sense      | Amplification of <i>TinCYP51B</i> RNAi cassette                                                                                    |
| M13rv | CAGGAAACAGCTATGAC                            | Anti-sense | Amplification of <i>TinCYP51B</i> RNAi cassette                                                                                    |

---

Restriction sites are italicized and underlined, and nucleotide substitutions are shown in lower case letters.

**TABLE S2** Overall genetic features of six *T. indotineae* strains

| Species and isolate no. <sup>a</sup>   | BioProject number | GenBank accession number (wgs) | Total Number of scaffolds | N50 (bp)  | Longest sequence length (bp) | Total sequence length (bp) | Depth of coverage (×) | GC content (%) |
|----------------------------------------|-------------------|--------------------------------|---------------------------|-----------|------------------------------|----------------------------|-----------------------|----------------|
| <i>T. indotineae</i>                   |                   |                                |                           |           |                              |                            |                       |                |
| TIMM20114<br>(UKJ1676/17; IFM 67092)   | PRJNA780377       | JAJVHL000000000                | 3                         | 8,011,651 | 10,184,091                   | 22,261,634                 | 40                    | 49             |
| TIMM20115<br>(UKJ1700/17II; IFM 67093) | PRJNA780377       | JAJVHI000000000                | 6                         | 4,361,119 | 6,825,914                    | 22,331,438                 | 38                    | 49             |
| TIMM20116<br>(UKJ1708/17; IFM 67094)   | PRJNA780377       | JAJVHK000000000                | 8                         | 4,066,087 | 7,369,201                    | 22,383,831                 | 46                    | 49             |
| TIMM20117<br>(200087/18; IFM 67095)    | PRJNA780377       | JAJVHH000000000                | 8                         | 3,672,843 | 6,160,204                    | 22,303,869                 | 32                    | 49             |
| TIMM20118<br>(UKJ1687/17; IFM 67096)   | PRJNA780377       | JAJVHJ000000000                | 6                         | 4,204,240 | 4,528,007                    | 22,316,814                 | 43                    | 49             |
| TIMM20119<br>(200123/18; IFM 67097)    | PRJNA780377       | JAJVHG000000000                | 8                         | 3,646,268 | 4,540,326                    | 22,297,103                 | 32                    | 49             |

<sup>a</sup>All the *T. indotineae* isolates were collected in India and preserved in the culture collection of Teikyo University Institute of Medical Mycology (TIMM) and Medical Mycology Research Center, Chiba University (IFM), through the National Bio-Resource Project, Japan (<http://www.nbrp.jp/>).

**TABLE S3** Conserved sequences HR1 and HR2 that could allow amplification of *CYP51B* in selected dermatophyte species of *Trichophyton* (T.), *Nannizia* (N.) and *Microsporum* (M).

| Species                      | HR1 sequence <sup>a</sup> | HR2 sequence <sup>b</sup> |
|------------------------------|---------------------------|---------------------------|
| <i>T. indotineae</i>         | 5'-AACCGAAAAGCAGC-3'      | 5'-AAGCGAAAGCAGC-3'       |
| <i>T. tonsurans</i>          | 5'-AACCGAAAAGCAGC-3'      | 5'-AAACGAAAGCAGC-3'       |
| <i>T. equinum</i>            | 5'-AACTGAAAAGCAGC-3'      | 5'-AAGCGAAAGCAGC-3'       |
| <i>T. interdigitale</i>      | 5'-AACCAAAAAGCAGC-3'      | 5'-AAGCGAAAGCAGC-3'       |
| <i>T. rubrum</i>             | 5'-AACCAAAAAGCAAC-3'      | 5'-AAACGAAAGCAGG-3'       |
| <i>T. violaceum</i>          | 5'-AACCAAAAAGCAAC-3'      | 5'-AAACGAAAGCAGG-3'       |
| <i>T. soudanense</i>         | 5'-AACCAAAAAGCAAC-3'      | 5'-AAACGAAAGCAGG-3'       |
| <i>T. verrucosum</i>         | 5'-AACCGAAAAGCAAA-3'      | 5'-AAGCGAAAGCAGC-3'       |
| <i>T. benhamiae</i>          | 5'-AAACGAAAAGCAAA-3'      | 5'-AAACGAAAGCAGC-3'       |
| <i>N. gypsea</i>             | 5'-AACCGAAAAGCAGC-3'      | 5'-AAACGAAAGCAGC-3'       |
| <i>M. canis</i> <sup>c</sup> | -                         | 5'-AAACGAAAGCAGC-3'       |

<sup>a</sup>The HR1 sequence is centered at about position -640 in relation to the initiator codon of the *CYP51B* gene.

<sup>b</sup>The HR2 sequence is localized within the *CYP51B* coding region, -27 to -14 nucleotides in relation to the last nucleotide of the stop codon of the *CYP51B* gene.

<sup>c</sup>The sequence in *M. canis* differs too much to identify an HR1-related sequence.

## CYP51B locus in TIMM20114

The original 3' of the *CYP51* gene (in TIMM20118\_CYP51B1) is marked in red (corresponding to H109\_04528 in *Trichophyton interdigitale* strain MR816).

CYP51B promoter is in violet

CYP51B ORF is in green

The two nearly identical sequences 5'-AACCGAAAAGCAGC-3' (HR1, for homologous recombination site 1) and 5'-AAGCGAAAAGCAGC-3' (HR2) at the borders of the CYP51B origin block are highlighted.

At 5': CAMK protein kinase (corresponding to H109\_04528 in *Trichophyton interdigitale* strain MR816)

At 3': Protein FYV4, mitochondrial (corresponding to H109\_04526 in *Trichophyton interdigitale* strain MR816)

The *TinCyp51B* gene in the genome of TIMM20114 (5' to 3')

```
CATGCAGAGTGC GG TATGCCTTTACCCATTGCATACTCTCTGCCGTCTAGTGATCAATTGCTAA
CCATCTGGGTACTGCAGATTT CAGGATCAAGCTCCCCACGATATCCAACCGCCATTGCCTGATA
TTCCACGAAAACAGGGGAGGAGACTTTGTGCAATTGTGGAAGATCTCTCTATCAATGGCACTT
TCATCAACGACGCCATCATCGGCAAGAACAAACGCCGAGAGCTCGAAAACGGCGACGAGATTAC
CATCCTGCAAGAATCCAGATTCATCTTCAACTACCCGCGGAGTCGGAACACAAGCAAGTTCCGA
CAGCAGTATAAGCTCTTTGATATGCTGGGTAGGGGACACTTTGCCTCGGTTTATCTATGCGCTG
AACGTTCTACGGGGATCAAGTATGCCGTCAAACATTTTCGAGAAAACGCCCGGGCGCAGTTCAGAG
GCTAGACCGTGAAGCACTACAGCAAGAGATTTCAATGCTGATGAGTGTCAACCATCCGAACATG
CTGTGCCTAAAGGATACCTTTGACGAGAGCGATGGTGTCTTCCCTGATTCCTGAGCTTGCGCCAG
AGGGCGAACTGTTCAACTGGATCATTAGGCATCAGAACTCAGCGAGGAGGAGACTCGAAAAGT
ATTCATTCAGCTTTTTTGAAGGTTTGAGATACCTGGTATGTCGTTTCGTTTTCTGGTTGATCAGAC
TCATGGCAGTGTATATGGCTAACCGTTGTCGTAGCATGAACGAAACATCATTACCCGTGACATA
AAGCCAGAGAACATTCTGGTTGTGACAAAAGATCTTACCGTAAAATTAGCAGACTTCGGCCTTG
CAAAGATTGTCGGCGAACACTCCTTTACCACCACGCTGTAAGTTCACCTACCTTCTGCCGTTCA
AATCTGGGGTCAATCTTACTAAGAGATCATAAAATCTAGATGTGGAACGCCTGGCTGTAAGTTT
CCCTGCTGCTCTGTTAACGCTGGTGCTTTTCATCCACCAAATGTGAATCTAACAATTCTTATCAG
ATGTTGCTCCTGAGATACTGGCAGAAAACGCTGAAGCCAGAATGTACACCCGAGCGGTTGACAT
CTGGTCACTCGGAGTGGTACTCTACATCTGCCTGTGCGGATTCCCTCCTTTCTCAGATGAACTG
TACCACCCAAGAGACTACCCATACTCAGAAAGAGCAGATCCAGCTCGGAATATTTAAGTATC
CTCTTCCATACTGGGACTCAATCGATTATAGAGCCATGGACCTTATCGACTCCATGATCGAAGT
CGACGTGAAGGAGCGTTTTGAAAGTAGATGAGTGTCTCCAGCACCCATGGATCACTGGCATCGAC
CCCGATGAGCCTAGGGTGGCAGACAGCACCGATGACCTAGCCGGGGCCATCGGTGGCCTGAGGG
TGTCCAAAGAACGCCGGCCAAC TATGGTCCGCAGGCTGTTGAGTGACATACATGAAGTCACGGT
CAAGCAGGTGGTGAAGACCAAGGAAGACGACCCTGCTTCCCAGGACATAACTATATAACCAGAAT
CATCCTGTGCCCTCGAGCCCAGGAGCCCAAACCGGCTGGCAACCGGAACTCAAAGGAGTTCATGG
AACTCGGTGGAAGTGGAGACCAGGTGTTATTTCGATGAGCAGTCTGACGACTCGCTGGAGCTTGA
GAGTGAGGCACGGAAGCCAGTTGTCCACCAAGACGACGCAGACAAGACTCCACGAGAAAGAAAG
AGGTAGCAGAAGCCCGATCCGTCCTTGGGATGGTATTCTGCTAGCTATAACCGTCTATTCCGGAC
TTTTGTTTCCAATTCCTTTTTCGTTTTATATTGATTGTGATCTTTCTTAATTTTTTCTTTAACTA
TACCCCCCGGTTGAAAGGTGATAGGGGGCCAAC T AACCGAAAAGCAGCAGAAAAACCGGCTTGG
TCGCTGCCTTGAGACGACGGCGATTCTCGTGTTTAGGATTTCATTTTTGAGTGATATAACTAT
```

GGGTACAATAGCGTCCACTGGGCAATGTAATTACAGTCTCTTCTCACTCACCACCGGACAATAA  
TAACAATATTAATATTGACGGACCGTTGATAGCTTAACCTGCCATGACTAAGCCGGCCTCCCTG  
AAGCCCGATGGCCTGATGATGCGCCACCGTCAGGTCTCGCTCGCTCAGGCAGCAGAGAATCC  
AGCGGAGGAGATGACGCCCTGCACGAACACCGTCCAGGACCGTCTCCGCCCCGTCGCGAGCTC  
GAATTGTAATCATCTCGACGGCCGTTGGCCTGCTCGCCGCAAGGGAGAAAAAGGGGGGCAGAAG  
GGCAGCGGTAATTTTGGTATTGGAGATGCAGCTGTAAACCAATAAAAAACGACGTAAAATACCA  
GGAACAATGCATTATCTTACAGTACCGTACGCCCTTGATAAAAATGCGAGTTCGATCTCAAGA  
TGCAACTTTTTTTTTCCCTTGCTTCGTCCGCAGCAGCTCAAGGCATTCATCACAAACAACGAA  
CAAGTCTTGAGCGGAAGCAGGAGGATAAGACGATCACCATGGGCCTCTTAGCCGACATTGTCTC  
TCGTTTTCTGCGAGAACTGCTCGACCCTGTCCACCGCCGCGCTCGTTCGCAAGTGCCGTATCGGCT  
TTTATCGTCCCTCTCCATTGTTATCAACGTCTGCAGCAGCTCCTGTTCAAGGACCTACAAAGC  
CTCCGGTGGTCTTCCACTGGGTTCGGTTCATTGGAAGCACGATCTCCTATGGAATTGACCCGTA  
CAAGTTCTTTGACGACTGCAAGGAGAAGGTTAGTTGGTGCATTTCAACTTAGCTATATAACCAGG  
TTGCGCAAAGCTAACGTATAAATAATTTTCGGTACTCTAGTATGGAGACATCTTCACATTCATAC  
TGCTGGGCAAGAAGACGACTGTTTTTCTCGGTACAAAGGGAAATGATTTTCAATTTTGAACGGCAA  
GCTCAAGGATGTTTGC CGGAGGATGTCTACTCCCCCTCACCACCCAGTGTTCCGACGACAT  
GTGGTGTATGATTGCCAAACTCCAAGCTCATGGAGCAGAAGAAGGTGTGTACAGCAATTTATT  
CCCGTCTACATCTCCTGGGCCTCCATTGCTAATTTAATCGTCTACCAGTTCGTCAAGTTCGGCC  
TCACCTCTGAAGCTCTCCGATCCTATGTCACCCTGATCACCAGGAAGTTGAGCAGTTCCTTCGA  
GTCTCCCCCGTCTTCAAGGGCGACTCCGGAGTTTTCAACGTCAGCAAGGTCATGGCTGAAATC  
ACCATCTACACCGCCTCTCGATCTCTACAGGGCAAGGAGTGCAGGAAAGTTGATTCAGCT  
TTGCGGAACTCTACTCCGATCTCGACATGGGCTTCGCCGCCATCAACTTCATGTTCCCATGGTT  
CCCCTTCCCACACAACCGCAAGCGTGACCGTGTCTAAAAGAAGATGGCCAGGTTTACACCGAC  
ATCATCCGTCAGCGACGTGAGGCTGGTGGAGAGAAAGACTCCGAGGACATGGTATGGAACCTGA  
TGTCGTCCGTGTACAAGAATGGAACGCCAATTCAGATATCGAAGTCGCCACATGATGATTGC  
TCTTCTTATGGCTGGCCAGCACTCTTCTTCCCTCCACCGGCTCCTGGATCGTTCCTCCGCCTTGCC  
AGCCGTCCAGATATTCTCGAGGAACTCTACGAGGAACAGAAACGTGTTCTCGGCGAGGATCTTC  
CACCCTCACCTACGAATCTCTCCAGAACTTGATCTTCACAACAATGTAATCAAGGAGACTCT  
CCGCTCCACGCTCCCATCCACTCTATCCTCCGTGCTGTTAAATCCCCCTATGCCCGTTGAAGGA  
ACTAACTATGTTGTCCCAACCTCTCACAACTCCTTGCCGCTCCTGGTGTTCCTCACGAGACC  
CTCAGTACTTCCCTGACCCTCTTGTGTTGGAACCTCACCGATGGGAGAACACGTCGGTGTAC  
CGTAGTCGAGGCCAGTGAAGAAAAGACAGATTACGGATACGGTTTTGGTTAGCAAGGGTGCCAAC  
AGCCCTTACCTCCATTCCGCTCAGGCAGACACAGATGCATCGGTGAACAATTTGCATATGTTT  
AGCTTGAACCGTAACAGCTACGTTAGCCAGACTAATGAAATGGAAGCAAGTTGAAGGCCACCA  
AGATGTTGTGCCCAACTGACTATTCCGTAAGTTTGGCATATTACGCTCCTTTTTATTTTGTCT  
CGATTTTACTAACTTTGCATTAATAGTCCCTCTTCTCGAAGCCCCTTGCGGACCCAATGGTCTC  
GTGGGAGAAAGCGAAAGCAGCCTTCCAGAAATGATAATCACGACTGCGGATTGAATCATGTTAA  
ATTTCTTGCTTCTTGCTAATTTATTTCTTCTTTTCTTACGTTTATACACCGAGCCATATTTG  
CACTTTATGGTCACGCAAATAGGTTTTTCGGAATAGAGCATATGTAATAAAAACCTTTCTTTTGAC  
CATGCTTTTGAAGATGGGGGATGTAGATAATAGTATTATTCTAATACAGCCATTTATTACAATA  
CTCTAGATGAACAGGAAAGTTGCAGTTACTCCGTTAGCTTTGGTGCAGAAACAAAATGGTAATA  
TACATTGGAAAATAGTACATCTTCCCCTAGCTGGGATAATCTAGCATCTAACAGCGATATCCAA  
GCCAGTAATGTCAGGAAGTAACCAGCCAGCAACGTCGTTAATCCCCTGCCCCCTTTCAACTCCG  
ACGCTACAAAACGCCTAAGCAGCTGCCTGAGCATTCCCTCCTCTCCGCCAACGCTCTCTTCGCTC  
TGATCTCCTTCTGTCTTCTCTGACCACCGTCAATCTTTCTGCCACGCTTATGCTCCACATGCC  
ATCAGTAACCTGAACCTTGACGGCGGTACTCCATGTGTTTGAATAATCTGAGCATAACGGCCCC  
TTGATCATATTTCCGTTGGTGCAATTTATAATGGGCAAACTTTTTGAGTGGCTTGAAGTATCCT  
TGAGCTCTGTTTCGCTGGTGGTAGATTGACAATCGCATAACGCATTCCAGGTGTAAGGGTAGC  
GGTGCCCATTTGTCTAACATCTAGGGACTCTCCGTCCGTGGCATTGGTAGTTTTTGCACCTTTT  
GACTTTTTCGACGGGGACCTCAACAGCTCTCAGCTCAGCAACACCGTCAACAACGTTTTCGAAAT  
CACCTCCTGGGCCGTAGTCTGCTGTCTGAATTTCTCTCTCCACCGCAGTATGTATCGTCTGTC  
CCTTGTCATTTCTATGCCCAATTTCTCGAAGCTCAGCCGAGTCCGCTGTAACAATTGCTTCCAT



CCGGTGATTTTGCTGGAATATCTGGACATGTTTCGCCCAATTAGGCGTAGGAATGTTTCGACAT  
CGGGCACGAATGGGGTAGGTGATGGCACTGTTGCGGGTTTTCGAGATTGATGAAGGTACCGTAC  
GCATGGCTGATAATGGGGTTTGTGACGGAAGTGAAGAGCCGTAGTGGAAGGGATGTTCTGGCA  
TTAAAGCCCCGGTATGCGCGCCGCAGCCATAGTGGTTATATCGCCTTATATCAAACCGTTCAATG  
TCGAGATCTGGGGGGTGAAGATTTTAATTTAGCTCGTGGTGTAAAGAACACCATCGGCGGGCGTG  
ACGAAAGCGAAAAAAGCCACGGCACCAAGGGCCCAGGTAAACCGGTAAGGGACTCAAGGCGAGT  
CAATCCAATGCTCAATGGCGCTGTATAGAAGATGTTCAACTGGTTCTTCGACTTCGTTCAAGAT  
TTTGCACCAAAATTTTGAATTAGGTCCGACGGCCTTAGCTCGGATCAACAAAACGCCGATCTCC  
GGTGAGCTCGGGCCAGCCGAAGCTTCCATCGCAACATTCAAAGATGAAAGACGACGATATATAT  
TTTGATAACAAACAAAGCTGTATTGTTGATTGAATACTAGGAGAGCTGCTCAGAGCAGTGTCTC  
ACTCTTGTGCCACTCTATCCTTTGTCTCGCGAAATTGGTGGAAGCCAATTTTCGCTTGACATTAT  
GGCAGTGTGCGCGCTTCCCTCTCAATTCCCTCCCATCACTACTACCGGTGCTCCAAAGTCGTTA  
GCGATGAGAAAATATTGCTTCTCAAGAGCCTCGGACGGCGCCTAGTGGTGATCCTGCAGTTCCTA  
AGCCCTCCATGCCCGAACCAGAGCTGGCGGAGCAGTTAAACGCTGATGTACGGCGGAAATATGT  
CAAAGGTGGGCGGGCAAATACACCCCAACCATTGGGACCCCATAAATGCTAACATTTGGTTATTC  
TGAAAGATAAGAAGCTCGGTGAAGGTACATATGCAGTTGTTTACCTAGGCCATCTACGAGATGA  
TCCCACCTTCGCTCGTTGCAATCAAGAAAATAAACTAAACGCCGAGTACAAGGACGGGCTATCC  
ATGGACGCCATCCGTGAAGTAAAGTACCTTCAGGAAGTGTCTCACCCGAACGTAATTGCGTTGC  
ATGACGTTTTCTCCTCAAAGGATCAAATCTAAACCTCGTCCTTGAATTTTTACCCCTTGGAGA  
TCTTCAAATGTTGATCAAAGACAACCTCTATCCAGTACGGTGTGGCTGATATAAAAGCATGGATA  
AGCATGCTTGCACGTGGAGTGTGGTTCTGTCATAAGAATTTCACTTACACCGTGATATTAAGC  
CTAACAACTTATTAATTGCATCGGATGGAGAAGTTAAATTAGCGGATTTTGGTCTTGCCAGATC  
CTTTGCCGATCCATATCTCAACATGACACATCAAGTCATCACAAGATGGTACAGGCCATTAGAA  
CTACTCTTCGGCGCCAGGCAATATTCCGGTGCAGTCGACATATGGTCTATGGG

## **CYP51B locus in TIMM20118**

The original 3' of the *CYP51* gene (in TIMM20118\_CYP51B1) is marked in red (corresponding to H109\_04528 in *Trichophyton interdigitale* strain MR816).

CYP51B promoters are in violet  
CYP51B alleles are in green

The two nearly identical sequences 5'-AACCGAAAAGCAGC-3' (HR1, for homologous recombination site 1) and 5'-AAGCGAAAAGCAGC-3' (HR2) at the borders of the CYP51B origin block are highlighted.

At 5': CAMK protein kinase (corresponding to H109\_04528 in *Trichophyton interdigitale* strain MR816).

At 3': Protein FYV4, mitochondrial (corresponding to H109\_04526 in *Trichophyton interdigitale* strain MR816).

The 7 *TinCyp51B* gene tandem repeats in the genome of TIMM20118 (5' to 3')

```
CATGCAGAGTGCGGTATGCCTTTACCCATTGCATACTCTCTGCCGTCTAGTGATCAATTGCTAA
CCATCTGGGTACTGCAGATTTTCAGGATCAAGCTCCCCACGATATCCAACCGCCATTGCCTGATA
TTCCACGAAAACAGGGGAGGAGACTTTGTGCAATTGTGGAAGATCTCTCTATCAATGGCACTT
TCATCAACGACGCCATCATCGGCAAGAACAAACGCCGAGAGCTCGAAAACGGCGACGAGATTAC
CATCCTGCAAGAATCCAGATTCATCTTCAACTACCCGCGGAGTCGGAACACAAGCAAGTTCCGA
CAGCAGTATAAGCTCTTTGATATGCTGGGTAGGGGACACTTTGCCTCGGTTTATCTATGCGCTG
AACGTTCTACGGGGATCAAGTATGCCGTCAAACATTTTCGAGAAAACGCCCGGGCGCAGTTTCAGAG
GCTAGACCGTGAAGCACTACAGCAAGAGATTTCAATGCTGATGAGTGCAACCATCCGAACATG
CTGTGCCTAAAGGATACCTTTGACGAGAGCGATGGTGTCTTCCTGATTCCTGAGCTTGCGCCAG
AGGGCGAACTGTTCAACTGGATCATTAGGCATCAGAACTCAGCGAGGAGGAGACTCGAAAAGT
ATTCATTTCAGCTTTTTTGAAGTTTTGAGATACCTGGTATGTCGTTTCGTTTTCTGGTTGATCAGAC
TCATGGCAGTGTATATGGCTAACCGTTGTCGTAGCATGAACGAAACATCATTACCCGTGACATA
AAGCCAGAGAACATTCTGGTTGTCGACAAAGATCTTACCGTAAAATTAGCAGACTTCGGCCTTG
CAAAGATTGTCGGCGAACACTCCTTTACCACCACGCTGTAAGTTCACCTACCTTCTGCCGTTCA
AATCTGGGGTCAATCTTACTAAGAGATCATAAAATCTAGATGTGGAACGCCTGGCTGTAAGTTT
CCCTGCTGCTCTGTTAACGCTGGTGTCTTTCATCCACCAAATGTGAATCTAACAATTCCTTATCAG
ATGTTGCTCCTGAGATACTGGCAGAAAACGCTGAAGCCAGAATGTACACCCGAGCGGTTGACAT
CTGGTCACTCGGAGTGGTACTCTACATCTGCCTGTGCGGATTCCCTCCTTTCTCAGATGAACTG
TACCACCCAAGAGACTACCCATACTCAGAAAGAGCAGATCCAGCTCGGAATATTTAAGTATC
CTCTTCCATACTGGGACTCAATCGATTATAGAGCCATGGACCTTATCGACTCCATGATCGAAGT
CGACGTGAAGGAGCGTTTTGAAAGTAGATGAGTGTCTCCAGCACCCATGGATCACTGGCATCGAC
CCCGATGAGCCTAGGGTGGCAGACAGCACCGATGACCTAGCCGGGGCCATCGGTGGCCTGAGGG
TGTCCAAAGAACGCCGGCCAACATATGGTCCGCAGGCTGTTGAGTGACATACATGAAGTCACGGT
CAAGCAGGTGGTGAAGACCAAGGAAGACGACCCTGCTTCCCAGGACATAACTATATAACCAGAAT
CATCCTGTGCCCTCGAGCCCAGGAGCCCAAACCGGCTGGCAACCGGAACTCAAAGGAGTTCATGG
AACTCGGTGGAAGTGGAGACCAGGTGTTATTCGATGAGCAGTCTGACGACTCGCTGGAGCTTGA
GAGTGAGGCACGGAAGCCAGTTGTCCACCAAGACGACGACGACGACAAGACTCCACGAGAAAAGAAAG
AGGTAGCAGAAGCCCGATCCGTCTTGGGATGGTATTCTGCTAGCTATACCGTGCTATTCGGGAC
TTTTGTTTCCAATTCCTTTTTTCGTTTATATTGATTGTGATCTTTCTTAATTTTTTCTTTAACTA
```

TACCCCCGGTTGAAAGGTGATAGGGGGCCAACTAACCAGAAAAGCAGCAGAAAAACCGGCTTGG  
TCGCTGCCTTGGAGACGACGGCGATTCTCGTGTTAGGATTTCATTTTTGAGTGATATAACTAT  
GGGTACAATAGCGTCCACTGGGCAATGTAATTACAGTCTCTTCTCACTCACCACCGGACAATAA  
TAACAATATTAATATTGACGGACCGTTGATAGCTTAACCTGCCATGACTAAGCCGGCCTCCCTG  
AAGCCCGATGGCCTGATGATGCGCCCACCGTCAGGTCTCGCTCGCTCAGGCAGCAGAGAATCC  
AGCGGAGGAGATGACGCCCTGCACGAACACCGTCCAGGGACCGTCTCCGCCCCGTGCGGAGCTC  
GAATTGTAATCATCTCGACGGCCGTTGGCCTGCTCGCCGCAAGGGAGAAAAAGGGGGGCAGAAG  
GGCAGCGTAATTTTGGTATTGGAGATGCAGCTGTAAACCAATAAAAAACGACGTAAAATACCA  
GGAACAATGCATTATCTTACAGTACCGTACGCCCTTGATAAAAATGCGAGTTGATCTCAAGA  
TGCAACTTTTTTTTTCCCTTGCTTCGTCCGCAGCAGCTTCAAGGCATTCATCACAAACAACGAA  
CAAGTCTTGAGCGGAAGCAGGAGGATAAGACGATCACCATGGGCCTCTTAGCCGACATTGTCTC  
TCGTTTCTGCGAGAACTGCTCGACCCTGTCCACCGCCGCGCTCGTTCGCAAGTGCCGTATCGGCT  
TTTATCGTCCCTCTCCATTGTTATCAACGTCTGCAGCAGCTCCTGTTCAAGGACCCTACAAAGC  
CTCCGGTGGTCTTCCACTGGGTTCCGGTCATTGGAAGCACGATCTCCTATGGAATTGACCCGTA  
CAAGTTCTTTGACGACTGCAAGGAGAAGGTTAGTTGGTGCAATTCAACTTAGCTATATAACCAGG  
TTGCGCAAAGCTAACGTATAAATAATTTTCGGTACTCTAGTATGGAGACATCTTACATTCCATAC  
TGCTGGGCAAGAAGACGACTGTTTTTCTCGGTACAAAGGGAAATGATTTCATTTTGAACGGCAA  
GCTCAAGGATGTTTGC GCGGAGGATGTCTACTCCCCCTCACCACCCAGTGTTCGGACGACAT  
GTGGTGTATGATTGCCAAACTCCAAGCTCATGGAGCAGAAGAAGGTGTGTACAGCAATTTATT  
CCCGTCTACATCTCCTGGGCCTCCATTGCTAATTTAATCGTCTACCAGTTCGTCAAGTTCGGCC  
TCACCTCTGAAGCTCTCCGATCCTATGTCACCCTGATCACCAAGGAAGTTGAGCAGTTCTTCGA  
GTCTCCCCCGTCTTCAAGGGCGACTCCGGAGTTTTCAACGTGAGCAAGGTGATGGCTGAAATC  
ACCATCTACACCGCCTCTCGATCTCTACAGGGCAAGGAGTGCAGGAAAGTTGATTCAGCT  
TTGCGGAACTCTACTCCGATCTCGACATGGGCTTCGCCGCCATCAACTTCATGTTCCCATGGTT  
CCCCTTCCCACACAACCGCAAGCGTGACCGTGCTCAAAAAGAAGATGGCCAGGTTTACACCGAC  
ATCATCCGTCAGCGACGTGAGGCTGGTGGAGAGAAAGACTCCGAGGACATGGTATGGAACCTGA  
TGTCGTCCGTGTACAAGAATGGAACGCCAATTCAGATATCGAAGTCGCCACATGATGATTGC  
TCTTCTTATGGCTGGCCAGCACTCTTCTTCCCTCCACC GGCTCCTGGATCGTTCTCCGCCTTGCC  
AGCCGTCCAGATATTCTCGAGGAACTCTACGAGGAACAGAAACGTGTTCTCGGCGAGGATCTTC  
CACCCTCACCTACGAATCTCTCCAGAACTTGATCTTCAACAATGTAATCAAGGAGACTCT  
CCGCTCCACGCTCCCATCCACTCTATCCTCCGTGCTGTTAAATCCCCTATGCCCGTTGAAGGA  
ACTAACTATGTTGTCCCAACCTCTCACAACCTCCTTGCCGCTCCTGGTGTTCCTCACGAGACC  
CTCAGTACTTCCCTGACCCTCTTGTGTTGGAACCCTCACCAGTGGGAGAACACGTCCGGTGTAC  
CGTAGTCGAGGCCAGTGAAGAAAAGACAGATTACGAATACGGTTTGGTTAGCAAGGGTGCCAAC  
AGCCCTTACCTCCATTCCGCTCAGGCAGACACAGATGCATCGGTGAACAATTTGCATATGTTT  
AGCTTGAACCGTAACAGCTACGTTAGCCAGACTAATGAAATGGAAGCAAGTTGAAGGCACCAA  
AGATGTTGTGCCGCAACTGACTATTCCGTAAGTTTGGCATATTACGCTCCTTTTTATTTGCT  
CGATTTTACTAACTTTGCATTAATAGTCCCTCTTCTCGAAGCCCCTTGCGCACCCAATGGTCTC  
GTGGGAGAAAGCGAAAAGCAGCAGAAAAACCGGCTTGGTTCGCTGCCTTGGAGACGACGGCGATTCT  
CGTGTTTAGGATTTCATTTTGAGTGATATAACTATGGGTACAATAGCGTCCACTGGGCAATGT  
AATTACAGTCTCTTCTCACTCACCACCGGACAATAATAACAATATTAATATTGACGGACCGTTG  
ATAGCTTAACCTGCCATGACTAAGCCGGCCTCCCTGAAGCCGCGATGGCCTGATGATGCGCCCA  
CCGTACAGGTCTCGCTCGCTCAGGCAGCAGAGAATCCAGCGGAGGAGATGACGCCCTGCACGAAC  
ACCGTCCAGGACCGTCTCCGCCCCGTGCGGAGCTCGAATTGTAATCATCTCGACGGCCGTTGG  
CCTGCTCGCCGCAAGGGAGAAAAAGGGGGCAGAAGGGCAGCGTAATTTTGGTATTGGAGATG  
CAGCTGTAAACCAATAAAAAACGACGTAAAATACCAGGAACAATGCATTATCTTACAGTACCGT  
ACGCCCCCTGCATAAAAATGCGAGTTCGATCTCAAGATGCAACTTTTTTTTTCCCTTGCTTCGTC  
CGCAGCAGCTTCAAGGCATTCATCACAAACAACGAACAAGTCTTGAGCGGAAGCAGGAGGATAA  
GACGATCACCATGGGCCTCTTAGCCGACATTGTCTCTCGTTTCTGCGAGAACTGCTCGACCCTG  
TCCACCGCCGCGCTCGTTCGCAAGTGCCGTATCGGCTTTTATCGTCTCTCCATTGTTATCAACG  
TCTTGCAGCAGCTCCTGTTCAAGGACCCTACAAAGCCTCCGGTGGTCTTCCACTGGGTTCCGGT  
CATTGGAAGCACGATCTCCTATGGAATTGACCCGTACAAGTTCTTTGACGACTGCAAGGAGAAG

GTTAGTTGGTGCAATTCAACTTAGCTATATACCAGGTTGCGCAAAGCTAACGTATAAATAATTT  
CGGTACTCTAGTATGGAGACATCTTCACATTCATACTGCTGGGCAAGAAGACGACTGTTTTTCT  
CGGTACAAAGGGAAATGATTTCAATTTTGAACGGCAAGCTCAAGGATGTTTGC GCGGAGGATGTC  
TACTCCCCCTCACCACCCAGTGTTCGGACGACATGTGGTGTATGATTGCCAAACTCCAAGC  
TCATGGAGCAGAAGAAGGTGTGTACAGCAATTTATTCCCGTCTACATCTCCTGGGCCTCCATTG  
CTAATTTAATCGTCTACCAGTTCGTCAAGTTCGGCCTCACCTCTGAAGCTCTCCGATCCTATGT  
CACCTGATCACCAAGGAAGTTGAGCAGTTCCTCGAGTCTCCCCCGTCTTCAAGGGCGACTCC  
GGAGTTTTCAACGTCAGCAAGGTCATGGCTGAAATCACCATCTACACCGCCTCTCGATCTCTAC  
AGGGCAAGGAGGTGCGAGGAAAGTTCGATTCAGCTTTGCGGAACTCTACTCCGATCTCGACAT  
GGGCTTCGCCGCCATCAACTTCATGTTCCCATGGTTCCTTCCCACACAACCGCAAGCGTGAC  
CGTGCTCAAAAAGAAGATGGCCCAGGTTTACACCGACATCATCCGTCAGCGACGTGAGGCTGGTG  
GAGAGAAAGACTCCGAGGACATGGTATGGAACCTTGATGTCGTCGTCGTAACAAGATGGAACGCC  
AATTCCAGATATCGAAGTCGCCACATGATGATTGCTCTTCTTATGGCTGGCCAGCACTCTTCT  
TCCTCCACCGGCTCCTGGATCGTTCTCCGCCTTGCCAGCCGTCAGATATTCTCGAGGAACTCT  
ACGAGGAACAGAAACGTGTTCTCGGCGAGGATCTTCCACCCTCACCTACGAATCTCTCCAGAA  
ACTTGATCTTCACAACAATGTAATCAAGGAGACTCTCCGCCTCCACGCTCCCATCCACTCTATC  
CTCCGTGCTGTTAAATCCCCTATGCCCGTTGAAGGAACTAATACTATGTTGTCCCAACCTCTCACA  
ACCTCCTTGCCGCTCCTGGTGTTCCTCAGGACCCCTCAGTACTTCCCTGACCCTCTTGTGTTG  
GAACCCTCACCGATGGGAGAACAACGTCGGTGTACCGTAGTCGAGGCCAGTGAAGAAAAGACA  
GATTACGAATACGGTTTGGTTAGCAAGGGTGCCAACAGCCCTTACCTCCATTTCGGCTCAGGCA  
GACACAGATGCATCGGTGAACAATTTGCATATGTTTACGCTTGGAAACCGTAACAGCTACGTTAGC  
CAGACTAATGAAATGGAAGCAAGTTGAAGGCACCAAAGATGTTGTGCCGCAACTGACTATTTCG  
GTAAGTTTGGCATATTACGCTCCTTTTTTATTTTGTCTCGATTTTACTAACTTTGCATTAATAGTC  
CCTCTTCTCGAAGCCCCTTGGCGACCCAATGGTCTCGTGCGGAGAGAGCGAAAGCAGCAGAAAAAC  
CGGCTTGGTTCGCTGCCTTGGAGACGACGGCGATTCTCGTGTTTAGGATTTTCATTTTTGAGTGAT  
ATAACTATGGGTACAATAGCGTCCACTGGGCAATGTAATTACAGTCTCTTCTCACTCACCACCG  
GACAATAATAACAATATTAATATTGACGGACCGTTGATAGCTTAACCTGCCATGACTAAGCCGG  
CCTCCCTGAAGCCGCGATGGCCTGATGATGCGCCACCGTCAGGTCTCGCTCGCTCAGGCAGCA  
GAGAATCCAGCGGAGGAGATGACGCCCTGCACGAACACCGTCCAGGGACCGTCTCCGCCCGCTC  
GCGAGCTCGAATTGTAATCATCTCGACGGCCGTTGGCCTGCTCGCCGCAAGGGAGAAAAAGGGG  
GGCAGAAGGGCAGCGGTAATTTTGGTATTGGAGATGCAGCTGTAACCAATAAAAAACGACGTA  
AAATACCAGGAACAATGCATTATCTTACAGTACCGTACGCCCTTGCATAAAATGCGAGTTCGA  
TCTCAAGATGCAACTTTTTTTTTCCCTTGCTTCGTCCGACGAGCTTCAAGGCATTATCACA  
ACAACGAACAAGTCTTGAGCGGAAGCAGGAGGATAAGACGATCACCATGGGCCTCTTAGCCGAC  
ATTGTCTCTCGTTTCTGCGAGAAGTGTCTGACCCTGTCCACCGCCGCGCTCGTCGCAAGTGCCG  
TATCGGCTTTTATCGTCTCTCCATTGTTATCAACGTCCTGCAGCAGCTCCTGTTCAAGGACCC  
TACAAAGCCTCCGGTGGTCTTCCACTGGGTTCGGTCAATTGGAAGCACGATCTCCTATGGAATT  
GACCCGTACAAGTCTTTTGCAGACTGCAAGGAGAAGGTTAGTTGGTGCAATTCAACTTAGCTAT  
ATACCAGGTTGCGCAAAGCTAACGTATAAATAATTTCCGGTACTCTAGTATGGAGACATCTTCAC  
ATTCATACTGCTGGGCAAGAAGACGACTGTTTTTCTCGGTACAAAGGGAAATGATTTCAATTTG  
AACGGCAAGCTCAAGGATGTTTGC GCGGAGGATGTCTACTCCCCCTCACCACCCAGTGTTCG  
GACGACATGTGGTGTATGATTGCCAAACTCCAAGCTCATGGAGCAGAAGAAGGTGTGTACAGC  
AATTTATTCCCGTCTACATCTCCTGGGCCTCCATTGCTAATTTAATCGTCTACCAGTTCGTCAA  
GTTCCGGCCTCACCTCTGAAGCTCTCCGATCCTATGTCACCCTGATCACCAAGGAAGTTGAGCAG  
TTCTTCGAGTCTCCCCCGTCTTCAAGGGCGACTCCGGAGTTTTTCAACGTCAGCAAGGTCATGG  
CTGAAATCACCATCTACACCGCCTCTCGATCTCTACAGGGCAAGGAGGTGCGAGGAAAGTTCGA  
TTCCAGCTTTGCGGAACTCTACTCCGATCTCGACATGGGCTTCGCCGCCATCAACTTCATGTT  
CCATGGTTCCCCTTCCCACACAACCGCAAGCGTGACCGTGTCAAAAAGAAGATGGCCCAGGTTT  
ACACCGACATCATCCGTCAGCGACGTGAGGCTGGTGGAGAGAAAGACTCCGAGGACATGGTATG  
GAACTTGATGTCGTCGTCGTAACAAGAATGGAACGCCAATTCAGATATCGAAGTCGCCACATG  
ATGATTGCTCTTCTTATGGCTGGCCAGCACTCTTCTTCTCCACCGGCTCCTGGATCGTTCTCC  
GCCTTGCCAGCCGTCAGATATTCTCGAGGAACTCTACGAGGAACAGAAACGTGTTCTCGGCGA

GGATCTTCCACCACTCACCTACGAATCTCTCCAGAACTTGATCTTCAACAACATGTAATCAAG  
GAGACTCTCCGCCTCCACGCTCCCATCCACTCTATCCTCCGTGCTGTTAAATCCCCTATGCCCG  
TTGAAGGAACTAACTATGTTGTCCCAACCTCTCAACAACCTCCTTGCCGCTCCTGGTGTTCCTC  
ACGAGACCCCTCAGTACTTCCCTGACCCTCTTGTGTTGGAACCCCTCACCGATGGGAGAACAACGTC  
GGTGTACCCGTAGTCGAGGCCAGTGAAGAAAAGACAGATTACGAATACGGTTTGGTTAGCAAGG  
GTGCCAACAGCCCTTACCTCCCATTTCGGCTCAGGCAGACACAGATGCATCGGTGAACAATTTGC  
ATATGTTTCAGCTTGAACCGTAACAGCTACGTTAGCCAGACTAATGAAATGGAAGCAAGTTGAA  
GGCACCAAAGATGTTGTGCCGCAACTGACTATTTCGGTAAGTTTGGCATATTACGCTCCTTTTT  
ATTTTGCTCGATTTTACTAACTTTGCATTAATAGTCCCTCTTCTCGAAGCCCCTTGCCGACCCA  
ATGGTCTCGTGGGAGAAGCGAAAGCAGCAGAAAAACCGGCTTGGTTCGCTGCCTTGGAGACGACG  
CGATTCTCGTGTTAGGATTTCATTTTTGAGTGATATAACTATGGGTACAATAGCGTCCACTG  
GGCAATGTAATTACAGTCTTCTCACTCACCAACCGGACAATAATAACAATATTAATATTGACG  
GACCGTTGATAGCTTAACCTGCCATGACTAAGCCGGCTCCCTGAAGCCGCGATGGCCTGATGA  
TGCGCCCACCGTCAGGTCTCGCTCGCTCAGGCAGCAGAGAATCCAGCGGAGGAGATGACGCCCT  
GCACGAACACCGTCCAGGGACCGTCTCCGCCCCGTGCGGAGCTCGAATTGTAATCATCTCGACG  
GCCGTTGGCCTGCTCGCCGAAGGGAGAAAAAGGGGGGCAGAAGGGCAGCGGTAATTTTGGTAT  
TGGAGATGCAGCTGTAAACCAATAAAAAACGACGTAAAATACCAGGAACAATGCATTATCTTAC  
AGTACCGTACGCCCTTGCATAAAATGCGAGTTCGATCTCAAGATGCAACTTTTTTTTTCCCTT  
GCTTCGTCCGCAGCAGCTTCAAGGCATTCATCACAACAACGAACAAGTCTTGAGCGGAAGCAG  
GAGGATAAGACGATCACCATGGGCCTCTTAGCCGACATTGTCTCTCGTTTTCTGCGAGAAGTGT  
CGACCCTGTCCACCGCCGCGCTCGTTCGCAAGTGCCGATCGGCTTTTATCGTCTCTCCATTGT  
TATCAACGTCTGCAGCAGCTCCTGTTCAAGGACCCTACAAAGCCTCCGGTGGTCTTCCACTGG  
GTTCCGGTCATTGGAAGCACGATCTCCTATGGAATTGACCCGTACAAGTCTTTTGACGACTGCA  
AGGAGAAGGTTAGTTGGTGAATTCAACTTAGCTATATAACCAGGTTGCGCAAAGCTAACGTATA  
AATAATTTCCGTACTCTAGTATGGAGACATCTTACATTCATACTGCTGGGCAAGAAGACGACT  
GTTTTTCTCGGTACAAAGGGAAATGATTTTCATTTTGAACGGCAAGCTCAAGGATGTTTGCGCGG  
AGGATGTCTACTCCCCCTCACCAACCCAGTGTTCGGACGACATGTGGTGTATGATTGCCCAA  
CTCCAAGCTCATGGAGCAGAAGAAGGTGTGTACAGCAATTTATTCCCGTCTACATCTCCTGGGC  
CTCCATTGCTAATTTAATCGTCTACCAGTTCGTCAAGTTCGGCCTCACCTCTGAAGCTCTCCGA  
TCCTATGTACCCCTGATCACCAAGGAAGTTGAGCAGTTCCTTCGAGTCTCCCCCGTCTTCAAGG  
GCGACTCCGGAGTTTTCAACGTACGCAAGGTCATGGCTGAAATCACCATCTACACCGCCTCTCG  
ATCTCTACAGGGCAAGGAGGTGCGAGGAAAGTTCGATTCCAGCTTTGCGGAACTCTACTCCGAT  
CTCGACATGGGCTTCGCCGCCATCAACTTCATGTTCCCATGGTTCCCTTCCCACACAACCGCA  
AGCGTGACCGTGCTCAAAGAAGATGGCCAGGTTTACACCGACATCATCCGTACGCGACGTGA  
GGCTGGTGGAGAGAAAGACTCCGAGGACATGGTATGGAAC TTGATGTCTCGTCCGTGTACAAGAAT  
GGAACGCCAATTCAGATATCGAAGTCCGCCACATGATGATTGCTCTTCTTATGGCTGGCCAGC  
ACTCTTCTTCTCCACCGGCTCCTGGATCGTTCCTCCGCTTGCCAGCCGTCCAGATATTTCTCGA  
GGAECTTACGAGGAACAGAAACGTGTTCTCGGCGAGGATCTTCCACCACTCACCTACGAATCT  
CTCCAGAACTTGATCTTCAACAACATGTAATCAAGGAGACTCTCCGCCCTCACGCTCCCATCC  
ACTCTATCCTCCGTGCTGTTAAATCCCCTATGCCCGTTGAAGGAACTAACTATGTTGTCCCAAC  
CTCTCAACCTCCTTGCCGCTCCTGGTGTTCCTCACGAGACCCTCAGTACTTCCCTGACCCT  
CTGTTTTGGAACCCCTCACCGATGGGAGAACAACGTCCGGTGTACCCGTAGTCGAGGCCAGTGAAG  
AAAAGACAGATTACGAATACGGTTTTGGTTAGCAAGGGTGCCAACAGCCCTTACCTCCCATTTCGG  
CTCAGGCAGACACAGATGCATCGGTGAACAATTTGCATATGTTTCAGCTTGGAAACCGTAACAGCT  
ACGTTAGCCAGACTAATGAAATGGAAGCAAGTTGAAGGCACCAAGATGTTGTGCCGCAACTG  
ACTATTCGGTAAGTTTGGCATATTACGCTCCTTTTTATTTTGTCTCGATTTTACTAACTTTGCAT  
TAATAGTCCCTCTTCTCGAAGCCCCTTGCGGACCCAATGGTCTCGTGGGAGAAGCGAAAGCAGC  
AGAAAAACCGGCTTGGTTCGCTGCCTTGGAGACGACGGCGATTCTCGTGTTAGGATTTCATTTT  
TGAGTGATATAACTATGGGTACAATAGCGTCCACTGGGCAATGTAATTACAGTCTCTTCTCACT  
CACCAACCGGACAATAATAACAATATTAATATTGACGGACCGTTGATAGCTTAACCTGCCATGAC  
TAAGCCGGCCTCCCTGAAGCCGCGATGGCCTGATGATGCGCCCACCGTCAGGTCTCGCTCGCTC  
AGGCAGCAGAGAATCCAGCGGAGGAGATGACGCCCTGCACGAACACCGTCCAGGGACCGTCTCC

GCCCCGTCGCGAGCTCGAATTGTAATCATCTCGACGGCCGTTGGCCTGCTCGCCGCAAGGGAGA  
AAAAGGGGGGCAGAAGGGCAGCGTAATTTTGGTATTGGAGATGCAGCTGTAAACCAATAAAAA  
ACGACGTAAAATACCAGGAACAATGCATTATCTTACAGTACCGTACGCCCTTGCATAAAATGC  
GAGTTCGATCTCAAGATGCAACTTTTTTTTTTCCCTTGCTTCGTCCGCAGCAGCTTCAAGGCATT  
CATCACAACAACGAACAAGTCTTGAGCGGAAGCAGGAGGATAAGACGATCACC**ATGGGCCTCT**  
TAGCCGACATTGTCTCTCGTTTTCTGCGAGAACTGCTCGACCCTGTCCACCGCCGCGCTCGTCGC  
AAGTGCCGTATCGGCTTTTATCGTCCTCTCCATTGTTATCAACGTCTGCAGCAGCTCCTGTTC  
AAGGACCCTACAAAGCCTCCGGTGGTCTTCCACTGGGTCCGGTCATTGGAAGCACGATCTCCT  
ATGGAATTGACCCGTACAAGTCTTTGACGACTGCAAGGAGAAGGTTAGTTGGTGAATTCAAC  
TTAGCTATATAACCAGGTTGCGCAAAGCTAACGTATAAATAATTTCCGGTACTCTAGTATGGAGAC  
ATCTTCACATTCATACTGCTGGGCAAGAAGACGACTGTTTTTCTCGGTACAAAGGGAAATGATT  
TCATTTTGAACGGCAAGCTCAAGGATGTTTGC GCGGAGGATGTCTACTCCCCCTCACCACCC  
AGTGTTCGGACGACATGTGGTGTATGATTGCCAAACTCCAAGCTCATGGAGCAGAAGAAGGTG  
GTACAGCAATTTATTCCCGTCTACATCTCCTGGGCCTCCATTGCTAATTTAATCGTCTACCAG  
TTCGTCAAGTTCGGCCTCACCTCTGAAGCTCTCCGATCCTATGTCACCCTGATCACCAAGGAAG  
TTGAGCAGTTCCTCGAGTCTCCCCCGTCTTCAAGGGCGACTCCGGAGTTTTTCAACGTACAGCAA  
GGTCATGGCTGAAATCACCATCTACACCGCCTCTCGATCTCTACAGGGCAAGGAGGTGCGAGGA  
AAGTTCGATTCAGCTTTGCGGAACTCTACTCCGATCTCGACATGGGCTTCGCCGCCATCAACT  
TCATGTTCCCATGGTTCCCTTCCCACACAACCGCAAGCGTGACCGTGCTCAAAGAAGATGGC  
CCAGGTTTACACCGACATCATCCGTACGCGACGTGAGGCTGGTGGAGAGAAAGACTCCGAGGAC  
ATGGTATGGAACCTTGATGTGTCGTCGTTACAAGAATGGAACGCCAATTCAGATATCGAAGTCG  
CCCACATGATGATTGCTCTTCTTATGGCTGGCCAGCACTCTTCTTCTCCACCGGCTCCTGGAT  
CGTTCCTCCGCTTGCCAGCCGTCCAGATATTTCTCGAGGAACTCTACGAGGAACAGAAACGTGTT  
CTCGGCGAGGATCTTCCACCACTCACCTACGAATCTCTCCAGAACTTGATCTTACAACAATG  
TAATCAAGGAGACTCTCCGCCTCCACGCTCCCATCCACTCTATCCTCCGTGCTGTTAAATCCCC  
TATGCCCGTTGAAGGAACTAACTATGTTGTCCCAACCTCTCACAACCTCCTTGCCGCTCCTGGT  
GTTCCCTCACGAGACCCTCAGTACTTCCCTGACCCTCTTGTGTTGGAACCCTCACCGATGGGAGA  
ACAACGTCGGTGTACCGTAGTCGAGGCCAGTGAAGAAAAGACAGATTACGAATACGGTTTTGGT  
TAGCAAGGGTGCCAACAGCCCTTACCTCCATTCGGCTCAGGCAGACACAGATGCATCGGTGAA  
CAATTTGCATATGTTTACGCTTGAACCGTAACAGCTACGTTAGCCAGACTAATGAAATGGAAGC  
AAGTTGAAGGCACCAAAGATGTTGTGCCGCAACTGACTATTCCGGTAAGTTTTGGCATATTACGC  
TCCTTTTTTATTTTGCTCGATTTTACTAACTTTGCATTAATAGTCCCTCTTCTCGAAGCCCTTG  
GCGACCCAATGGTCTCGTGGGAG**AAGCGAAAGCAGC**AGAAAAACCGGCTTGGTCGCTGCCTTGG  
AGACGACGGCGATTCTCGTGT**TAG**GATTTTCAATTTTGGAGTGATATAACTATGGGTACAATAGC  
GTCCACTGGGCAATGTAATTACAGTCTCTTCTCACTCACACCGGACAATAATAACAATATTAA  
TATTGACGGACCGTTGATAGCTTAACTGCCATGACTAAGCCGGCCTCCCTGAAGCCGCGATGG  
CCTGATGATGCGCCACCGTCAGGTCTCGCTCGCTCAGGCAGCAGAGAATCCAGCGGAGGAGAT  
GACGCCCTGCACGAACACCGTCCAGGGACCGTCTCCGCCCCGTGCGGAGCTCGAATTGTAATCA  
TCTCGACGGCCGTTGGCCTGCTCGCCGCAAGGGAGAAAAAGGGGGCAGAAGGGCAGCGGTAAT  
TTTGGTATTGGAGATGCAGCTGTAAACCAATAAAAAACGACGTAAAATACCAGGAACAATGCAT  
TATCTTACAGTACCGTACGCCCTTGCATAAAATGCGAGTTCGATCTCAAGATGCAACTTTTTT  
TTTCCCTTGCTTCGTCCGCAGCAGCTTCAAGGCATTCATCACAACAACGAACAAGTCTTGAGC  
GGAAGCAGGAGGATAAGACGATCACCATGGGCCTCTTAGCCGACATTGTCTCTCGTTTTCTGCGA  
GAACTGCTCGACCCTGTCCACCGCCGCGCTCGTCGCAAGTGCCGTATCGGCTTTTATCGTCCTC  
TCCATTGTTATCAACGTCTGCAGCAGCTCCTGTTCAAGGACCCTACAAAGCCTCCGGTGGTCT  
TCCACTGGGTTCGGTCATTGGAAGCACGATCTCCTATGGAATTGACCCGTACAAGTCTTTTGA  
CGACTGCAAGGAGAAGGTTAGTTGGTGAATTTCAACTTAGCTATATAACCAGGTTGCGCAAAGCT  
AACGTATAAATAATTTCCGGTACTCTAGTATGGAGACATCTTCACATTCATACTGCTGGGCAAGA  
AGACGACTGTTTTTCTCGGTACAAAGGGAAATGATTTTCAATTTTGAACGGCAAGCTCAAGGATGT  
TTGCGCGGAGGATGTCTACTCCCCCTCACACCCCAGTGTTCCGACGACATGTGGTGTATGAT  
TGCCCAAACTCCAAGCTCATGGAGCAGAAGAAGGTGTGTACAGCAATTTATTCCCGTCTACATC  
TCCTGGGCCTCCATTGCTAATTTAATCGTCTACCAGTTCGTCAAGTTCGGCCTCACCTCTGAAG

CTCTCCGATCCTATGTACACCCTGATCACCAAGGAAGTTGAGCAGTTCTTTCGAGTCCCTCCCCCGT  
CTTCAAGGGCGACTCCGGAGTTTTCAACGTCAGCAAGGTCATGGCTGAAATCACCATCTACACC  
GCCTCTCGATCTCTACAGGGCAAGGAGGTGCGAGGAAAGTTCGATTCCAGCTTTGCGGAACTCT  
ACTCCGATCTCGACATGGGCTTCGCCGCCATCAACTTCATGTTCCCATGGTTCCCTTCCCACA  
CAACCGCAAGCGTGACCGTGCTCAAAAGAAGATGGCCCAGGTTTACACCGACATCATCCGTCAG  
CGACGTGAGGCTGGTGGAGAGAAAGACTCCGAGGACATGGTATGGAACCTGATGTGTCGTCGCTGT  
ACAAGAATGGAACGCCAATTCCAGATATCGAAGTCGCCACATGATGATTGCTCTTCTTATGGC  
TGGCCAGCACTCTTCTTCCCTCCACCGGCTCCTGGATCGTTCTCCGCCTTGCCAGCCGTCAGAT  
ATTCTCGAGGAACTCTACGAGGAACAGAAACGTGTTCTCGGCGAGGATCTTCCACCACTCACCT  
ACGAATCTCTCCAGAACTTGATCTTACACAATGTAATCAAGGAGACTCTCCGCCTCCACGC  
TCCCATCCACTCTATCCTCCGTGCTGTTAAATCCCCTATGCCCGTTGAAGGAACTAACTATGTT  
GTCCCAACCTCTCACAACCTCCTTGCCGCTCCTGGTGTTCCTCACGAGACCCTCAGTACTTCC  
CTGACCCTCTTGTGTTGGAACCTCACCGATGGGAGAACACGTCGGTGTACCCGTAGTCGAGGC  
CAGTGAAGAAAAGACAGATTACGAATACGGTTTTGGTTAGCAAGGGTGCCAACAGCCCTTACCTC  
CCATTCGGCTCAGGCAGACACAGATGCATCGGTGAACAATTTGCATATGTTTCAGCTTGAACCG  
TAACAGCTACGTTAGCCAGACTAATGAAATGGAAGCAAGTTGAAGGCACCAAAGATGTTGTGCC  
GCCAACTGACTATTCGGTAAGTTTTGGCATATTACGCTCCTTTTTTATTTTGCTCGATTTTACTAA  
CTTTGCATTAATAGTCCCTCTTCTCGAAGCCCCTTGCGACCCAATGGTCTCGTGGGAGAAAGCG  
AAAGCAGCAGAAAAACCGCTTGCTCGCTGCCTTGAGACGACGGCGATTCTCGTGTTTAGGAT  
TTCATTTTTGAGTGATATAACTATGGGTACAATAGCGTCCACTGGGCAATGTAATTACAGTCTC  
TTCTCACTCACCACCGACAATAATAACAATATTAATATTGACGGACCGTTGATAGCTTAACCT  
GCCATGACTAAGCCGGCCTCCCTGAAGCCGCGATGGCTGATGATGCGCCACCCTCAGGTCTC  
GCTCGCTCAGGCAGCAGAGAATCCAGCGGAGGAGATGACGCCCTGCACGAACACCGTCCAGGGA  
CCGTCTCCGCCCCGTCGCGAGCTCGAATTGTAATCATCTCGACGGCCGTTGGCCTGCTCGCCGC  
AAGGGAGAAAAGGGGGGCAGAAGGGCAGCGGTAATTTTGGTATTGGAGATGCAGCTGTA AAC  
AATAAAAAACGACGTAAAATACCAGGAACAATGCATTATCTTACAGTACCCTACGCCCTTGCA  
TAAAATGCGAGTTCGATCTCAAGATGCAACTTTTTTTTTTCCCTTGCTTCGTCCGACGAGCTTC  
AAGGCATTATCACAACAACGAACAAGTCTTGAGCGGAAGCAGGAGGATAAGACGATCACCAT  
GGGCCTCTTAGCCGACATTGTCTCTCGTTTCTGCGAGAACTGCTCGACCCTGTCCACCGCCGCG  
CTCGTTCGCAAGTGCCGTATCGGCTTTTTATCGTCTCTCCATTGTTATCAACGTCCTGCAGCAGC  
TCCTGTTCAAGGACCTACAAAGCCTCCGGTGGTCTTCCACTGGGTTCCGGTCATTGGAAGCAC  
GATCTCCTATGGAATTGACCCGTACAAGTCTTTGACGACTGCAAGGAGAAGGTTAGTTGGTGC  
AATTCAACTTAGCTATATAACCAGGTTGCGCAAAGCTAACGTATAAATAAATTCGGTACTCTAGT  
ATGGAGACATCTTACATTCATACTGCTGGGCAAGAAGACGACTGTTTTCTCGGTACAAAGGG  
AAATGATTTTCATTTTGAACGGCAAGCTCAAGGATGTTTGC GCGGAGGATGTCTACTCCCCCTC  
ACCACCCAGTGTTCGGACGACATGTGGTGTATGATTGCCCAAACCTCCAAGCTCATGGAGCAGA  
AGAAGGTGTGTACAGCAATTTATTCCTGCTACATCTCCTGGGCCTCCATTGCTAATTTAATCG  
TCTACCAGTTTCGTCAGTTTCGGCCTCACCTCTGAAGCTCTCCGATCCTATGTCACCCTGATCAC  
CAAGGAAGTTGAGCAGTTCTTCGAGTCCCTCCCCGCTTCAAGGGCGACTCCGGAGTTTTCAAC  
GTCAGCAAGGTCATGGCTGAAATCACCATCTACACCGCCTCTCGATCTCTACAGGGCAAGGAGG  
TGCGAGGAAAAGTTTCGATTCCAGCTTTGCGGAACTCTACTCCGATCTCGACATGGGCTTCGCCGC  
CATCAACTTCATGTTCCCATGGTTCCCTTCCCACACAACCGCAAGCGTGACCGTGCTCAAAAG  
AAGATGGCCAGGTTTTACACCGACATCATCCGTGACGACGTGAGGCTGGTGGAGAGAAAGACT  
CCGAGGACATGGTATGGAACCTGATGTGTCGTCGGTGTACAAGAATGGAACGCCAATTCCAGATAT  
CGAAGTCGCCACATGATGATTGCTCTTCTTATGGCTGGCCAGCACTCTTCTTCCCTCCACCGGC  
TCCTGGATCGTCTCCGCCTTGCCAGCCGTCCAGATATCTCGAGGAACTCTACGAGGAACAGA  
AACGTGTTCTCGGCGAGGATCTTCCACCACTCACCTACGAATCTCTCCAGAACTTGATCTTCA  
CAACAATGTAATCAAGGAGACTCTCCGCCTCCACGCTCCCATCCACTCTATCCTCCGTGCTGTT  
AAATCCCCTATGCCCGTTGAAGGAACTAACTATGTTGTCCCAACCTCTCACAACCTCCTTGCCG  
CTCCTGGTGTTCCTCACGAGACCCTCAGTACTTCCCTGACCCTCTTGTGTTGGAACCTCACCG  
ATGGGAGAACACGTCGGTGTACCCGTAGTCGAGGCCAGTGAAGAAAAGACAGATTACGAATAC  
GGTTTGGTTAGCAAGGGTGCCAACAGCCCTTACCTCCCATTTCGGCTCAGGCAGACACAGATGCA

TCGGTGAACAATTTGCATATGTTTCAGCTTGGAACCGTAACAGCTACGTTAGCCAGACTAATGAA  
ATGGAAGCAAGTTGAAGGCACCAAAGATGTTGTGCCGCAACTGACTATTCGGTAAGTTTGGCA  
TATTACGCTCCTTTTTTATTTTGGCTCGATTTTACTAACTTTGCATTAATAGTCCCTCTTCTCGAA  
GCCCTTGGCGACCCAATGGTCTCGTGGGAG **AAGCGAAAGCAGC** **CTTCCCAGAAATGA** TAATCA  
CGACTGCGGATTGAATCATGTAAATTTCTTGCTTCTTGCTAATTTATTTCTTCTCTTTCTTA  
CGTTTATACACCGAGCCATATTTGCACTTTATGGTCACGCAAATAGGTTTTCGGAATAGAGCAT  
ATGTAATAAAAACTTTCTTTTGACCATGCTTTTGAAGATGGGGGATGTAGATAATAGTATTATT  
CTAATACAGCCATTTATTACAATACTCTAGATGAACAGGAAAGTTGCAGTTACTCCGTTAGCTT  
TGGTGCAGAAAACAAATGGTAATATACATTGAAAATAGTACATCTTCCCCTAGCTGGGATAATC  
TAGCATCTAAACAGCGATATCCAAGCCAGTAATGTCAGGAAGTAACCAGCCAGCAACGTCGTTA  
ATCCCCTGCCCCCTTTCAACTCCGACGCTACAAAACGCCTAAGCAGCTGCCTGAGCATTCCTCC  
TCTCCGCCAACGCTCTCTTCGCTCTGATCTCCTTCTGTCTTCTCTGACCACCGTCAATCTTTCT  
GCCACGCTTATGCTCCACATGCCATCAGTAACCTGAACCTTGACGGCGGTACTCCATGTGTTT  
GGAATAATCTGAGCATAACGGCCCCTTGATCATATTTCCCCTGGTGCAATTTATAATGGGCAAAC  
TTTTGAGTGGCTTGGAAGTATCCTTGAGCTCTGTTTTCGCCTGGTGGTAGATTGACAATCGCATA  
ACGCATTCAGGTGTAAGGGTAGCGGTGCCATTGTGCTAACATCTAGGGACTCTCCGTCGGTG  
GCATTGGTAGTTTTTGCACCTTTGACTTTTCGACGGGGACCTCAACAGCTCTCAGCTCAGCAA  
CACCGTCAACAACGTTTTTCGAAATCACCTCCTGGGCCGTAGTCTGCTGTCTGAATTTCTCTCT  
CCACCGCAGTATGTATCGTCTGTCCCTTGTCAATTTCTATGCCCAATTCTCGAAGCTCAGCCGAG  
TCCGCTGTAAACAATTGCTTCCATCCGGTGATTTTTGCTGGAATATCTGGACATGTTTCGCCAA  
TTAGGCGTAGGAATGTTTTGACATCGGGCACGAATGGGGTAGGTGATGGCACTGTTGCGGGTTT  
TCGAGATTGATGAAGGTACCGTACGCATGGCTGATAATGGGGGTTTTGTGACGGAAGTGAAGAGC  
CGTAGTGAAGGGATGTTCTGGCATTAAAGCCCGGTATGCGCGCCGACCCATAGTGGTTATAT  
CGCCTTATATCAAACCGTTCAATGTCGAGATCTGGGGGTGAAGATTTTAATTTAGCTCGTGGT  
GTAAGAACACCATCGGCGGGCGTGACGAAAAGCGAAAAAAGCCACGGCACCAAGGGCCCAGGTAA  
ACCGGTAAGGGACTCAAGGCGAGTCAATCCAATGCTCAATGGCGCTGTATAGAAGATGTTCAAC  
TGGTTCTTCGACTTCGTTCAAGATTTTTGCACCAAATTTTTGAATTAGGTCCGACGGCCTTAGCT  
CGGATCAACAAAACGCCGATCTCCGGTGAGCTCGGGCCAGCCGAAGCTTCCATCGCAACATTCA  
AAGATGAAAGACGACGATATATATTTTTGATAACAAACAAAGCTGTATTGTTGATTGAATACTAG  
GAGAGCTGCTCAGAGCAGTGTCTCACTCTTGTGCCACTCTATCCTTTGTCTCGGAAATTGGTG  
GAAGCCAATTTTCGCTTGACATTATGGCAGTGTGCGCCGCTTCCCTCTCAATTCCTCCCATCACT  
ACTACCGGTGCTCCAAAGTCGTTAGCGATGAGAAATATTGCTTCTCAAGAGCCTCGGACGGCGC  
CTAGTGGTGATCCTGCAGTTCCTAAGCCCTCCATGCCCGAACAGAGCTGGCGGAGCAGTTAAA  
CGCTGATGTACGGCGGAAATATGTCAAAGGTGGGCGGGCAAATACACCCCAACCATTTGGGACCC  
CATAATGCTAACATTTGGTTATTCTGAAAGATAAGAAGCTCGGTGAAGGTACATATGCAGTTGT  
TTACCTAGGCCATCTACGAGATGATCCCCTTCGCTCGTTGCAATCAAGAAAATAAACTAAAC  
GCCGAGTACAAGGACGGGCTATCCATGGACGCCATCCGTGAAGTAAAGTACCTTCAGGAACTGT  
CTCACCCGAACGTAATTTGCGTTGCATGACGTTTTCTCCTCAAAGGATCAAATCTAAACCTCGT  
CCTTGAATTTTTTACCCCTTGGAGATCTTGAAATGTTGATCAAAGACAACCTATCCAGTACGGT  
GTGGCTGATATAAAAGCATGGATAAGCATGCTTGACAGTGGAGTGTGGTTCTGTCAATAAGAATT  
TCATTCTACACCGTGATATTAAGCCTAACAACTTATTAATTGCATCGGATGGAGAAGTTAAATT  
AGCGGATTTTTGGTCTTGCCAGATCCTTTGCCGATCCATATCTCAACATGACACATCAAGTCATC  
ACAAGATGGTACAGGCCATTAGAACTACTCTTCGGCGCCAGGCAATATTCCGGTGCAGTCGACA  
TATGGTCTATGGG



Protein alignments:

Green: Typical cytochrome P450 monooxygenases ER anchoring TM

Blue: Inhibitor binding sites (from *A. fumigatus*)

Red: Heme-binding cysteine

Gray: New C-terminus of the additional copies.

MGLLADIVSRFCENCSTLST AALVASAVSAFIVLSIVINVL QQLLFKDKPTKPPVVFHWVPVIGS  
MGLLADIVSRFCENCSTLST AALVASAVSAFIVLSIVINVL QQLLFKDKPTKPPVVFHWVPVIGS

TISYGIDPYKFFDDCKEKEYGDI FT FILLGKKT TVFLGTGKGNDFILNGKLDVCAED VYSPLTTP  
TISYGIDPYKFFDDCKEKEYGDI FT FILLGKKT TVFLGTGKGNDFILNGKLDVCAED VYSPLTTP

VFGRHVYDCPNSKLM EQKKFVKFGLTSEALRSYVTLITKEVEQFFESSPVFKGDSGVFNVSKV  
VFGRHVYDCPNSKLM EQKKFVKFGLTSEALRSYVTLITKEVEQFFESSPVFKGDSGVFNVSKV  
VFGRHVYDCPNSKLM EQKKFVKFGLTSEALRSYVTLITKEVEQFFESSPVFKGDSGVFNVSKV  
VFGRHVYDCPNSKLM EQKKFVKFGLTSEALRSYVTLITKEVEQFFESSPVFKGDSGVFNVSKV  
VFGRHVYDCPNSKLM EQKKFVKFGLTSEALRSYVTLITKEVEQFFESSPVFKGDSGVFNVSKV  
VFGRHVYDCPNSKLM EQKKFVKFGLTSEALRSYVTLITKEVEQFFESSPVFKGDSGVFNVSKV  
VFGRHVYDCPNSKLM EQKKFVKFGLTSEALRSYVTLITKEVEQFFESSPVFKGDSGVFNVSKV

MAEITIIYTASRSLQGKEVRGKFDSSFAELYSDDLDMGFAAIN F MFPWF PFPHNRKRDR AQKKMAQ  
MAEITIIYTASRSLQGKEVRGKFDSSFAELYSDDLDMGFAAIN F MFPWF PFPHNRKRDR AQKKMAQ

VYTDIIRQRREAGGEK DSEDMVWNLMS SVYKNGTPI PDIEVAHMMIALLMAGQHSSSSTG SWIV  
VYTDIIRQRREAGGEK DSEDMVWNLMS SVYKNGTPI PDIEVAHMMIALLMAGQHSSSSTG SWIV

LRLASRPDILEELYEEQKRVLGEDLPPLTYESLQKLDLHNNVIKETLRLHAPI HS ILRAVKSPM  
LRLASRPDILEELYEEQKRVLGEDLPPLTYESLQKLDLHNNVIKETLRLHAPI HS ILRAVKSPM
